# Supplementary material
Source: publisher figshare collection journal article supplement (https://gsapubs.figshare.com/ndownloader/files/23307770)
Supplement: Supplementary file 1 [file 23307770]

## Sheet: Status_21-Nov-2016.csv
Michel et al. (2018), Table DR 2: Apatite (U-Th-Sm)/He single grain data
Note: Aliquots which are strike-through are not considered for the sample age calculation. ppm values of U, Th and Sm are calculated from iCAP results by deviding the mass of the respective element by the grain mass (which is derived from measurements of 43Ca). eU is calculated by adding U-content and 0.235*Th-content. Mean sample ages are reported in table DR1.
Sample/ Aliquot	U (ppm)	U ± 2SD (pg)			Th (ppm)	Th ± 2SD (pg)			Sm (ppm)	Sm ± 2SD (pg)			He ± 1SD (mol)			grain mass (µg)	eU (ppm)	Th/U	Uncorrected grain age (Ma)	FT correction	Corrected grain age ± 1SD (Ma)
Ap_OP1502-1	1.68441	7.45881	±	0.463389	5.2269	23.1455	±	0.703805	143.671	636.195	±	8.99438	1.08882e-15	±	1.57966e-17	4.42814	2.91273	3.18322	15.5989	0.73146	21.2382	±	1.42713
Ap_OP1502-3	7.16235	7.6686	±	0.439879	10.3935	11.1281	±	0.503218	392.681	420.437	±	5.82054	9.12347e-16	±	1.64045e-17	1.07068	9.60482	1.48859	16.4078	0.594319	27.5331	±	1.88112
Ap_OP1502-4	5.55907	8.77616	±	0.698965	6.43786	10.1635	±	0.382524	323.483	510.686	±	5.62909	1.05676e-15	±	1.60193e-17	1.57871	7.07197	1.18798	17.5025	0.678308	25.835	±	2.08121
Ap_OP1502-5	12.4431	15.0989	±	0.57289	18.7604	22.7645	±	0.733158	466.153	565.646	±	8.41744	2.64169e-15	±	3.35962e-17	1.21343	16.8518	1.54662	23.8263	0.597118	39.9921	±	2.39677
Ap_OP1504-1	20.8445	42.2903	±	8.16271	18.5014	37.5366	±	1.43379	280.175	568.433	±	11.4562	5.97866e-16	±	1.58548e-17	2.02885	25.1923	0.91051	2.20508	0.668838	3.29339	±	0.57281
Ap_OP1504-2	80.9971	35.7754	±	8.23389	29.7201	13.127	±	1.13509	332.73	146.962	±	9.04837	1.24394e-16	±	6.89555e-18	0.441687	87.9814	0.376402	0.621682	0.621784	1.00125	±	0.257332
Ap_OP1504-3	161.168	150.481	±	30.5305	186.439	174.077	±	7.58356	215.443	201.158	±	19.4906	4.57911e-15	±	6.51694e-17	0.933694	204.981	1.18667	4.56801	0.623147	7.32172	±	1.31316
Ap_OP1504-4	94.4425	110.165	±	17.289	22.3078	26.0215	±	1.23963	212.008	247.303	±	24.4615	1.92664e-15	±	3.18642e-17	1.16648	99.6848	0.242303	3.15338	0.692874	4.54216	±	0.739413
Ap_OP1505-1	39.1283	48.2105	±	14.11	27.3951	33.7539	±	1.65567	127.371	156.936	±	14.6488	8.19448e-16	±	1.73249e-17	1.23211	45.5662	0.718211	2.89506	0.640124	4.52951	±	1.56208
Ap_OP1505-2	65.358	129.698	±	18.5639	19.7338	39.1603	±	1.60499	239.515	475.301	±	12.8045	6.67371e-15	±	9.9305e-17	1.98443	69.9955	0.309729	9.0794	0.678146	13.3868	±	1.94514
Ap_OP1505-3	53.1762	65.2509	±	14.674	38.8149	47.6285	±	1.94602	88.2824	108.329	±	10.5719	1.82482e-15	±	3.13837e-17	1.22707	62.2977	0.748775	4.60281	0.619527	7.43225	±	1.5652
Ap_OP1505-4	38.1052	64.1806	±	10.9927	10.2535	17.27	±	1.07868	300.077	505.421	±	11.6913	1.86243e-15	±	3.0902e-17	1.6843	40.5147	0.276031	5.23962	0.663416	7.85091	±	1.39507
Ap_OP1507-1	10.3598	57.3121	±	1.96412	64.3226	355.843	±	13.1985	321.149	1776.65	±	15.0913	2.04638e-15	±	3.01502e-17	5.53216	25.4756	6.36917	2.66983	0.760087	3.51787	±	0.20325
Ap_OP1507-2	10.6707	18.3284	±	0.721425	61.2936	105.28	±	2.14374	290.278	498.592	±	6.45415	5.27645e-16	±	1.16737e-17	1.71764	25.0747	5.89241	2.26402	0.644206	3.50735	±	0.203633
Ap_OP1507-3	16.0014	21.7149	±	0.910928	40.9371	55.5541	±	1.78103	281.233	381.65	±	5.85104	3.71966e-16	±	9.67697e-18	1.35706	25.6216	2.62439	1.96868	0.61652	3.19924	±	0.200513
Ap_OP1510-1	13.3624	23.4194	±	0.761536	39.2967	68.8729	±	1.82675	202.114	354.232	±	5.14935	1.2362e-15	±	1.92656e-17	1.75264	22.5971	3.01677	5.75388	0.701701	8.21465	±	0.466081
Ap_OP1510-2	8.90488	12.1787	±	0.59311	14.0603	19.2294	±	0.712692	62.0433	84.8528	±	4.35002	6.29573e-16	±	1.33093e-17	1.36764	12.209	1.61971	6.96725	0.682421	10.2169	±	0.656151
Ap_OP1510-3	17.5669	22.5337	±	0.694272	40.1319	51.4787	±	1.33351	196.683	252.293	±	2.98443	8.74528e-16	±	1.55492e-17	1.28274	26.9979	2.3435	4.65201	0.657281	7.08063	±	0.409629
Ap_OP1513-5	61.4797	66.1223	±	13.2588	300.109	322.772	±	11.19	202.668	217.972	±	13.7085	8.11535e-16	±	1.43303e-17	1.07551	132.005	5.00746	1.05985	0.612124	1.73318	±	0.184274
Ap_OP1513-6	56.8544	45.6725	±	11.9366	71.4978	57.4359	±	2.75205	222.415	178.671	±	10.0581	2.11313e-16	±	6.84834e-18	0.803324	73.6564	1.29003	0.69688	0.587823	1.18786	±	0.281591
Ap_OP1513-7	39.3404	39.6272	±	12.4714	95.3954	96.0908	±	4.61923	102.186	102.931	±	9.13474	2.90993e-16	±	9.62918e-18	1.00729	61.7584	2.48747	0.896409	0.617776	1.4518	±	0.323229
Ap_OP1513-8	53.9333	43.5194	±	9.33224	54.5331	44.0033	±	1.52051	274.977	221.882	±	8.71068	2.42771e-16	±	7.57429e-18	0.806911	66.7485	1.03723	0.852183	0.57313	1.48016	±	0.277305
Ap_OP1515-1	25.7186	31.2819	±	0.974903	14.1048	17.1559	±	0.649572	58.3351	70.9538	±	3.26368	3.58958e-16	±	8.43547e-18	1.21631	29.0332	0.562589	1.88243	0.611168	3.08619	±	0.1905
Ap_OP1515-2	8.11994	16.1208	±	0.647312	18.2863	36.3045	±	1.42416	200.842	398.738	±	5.4263	2.98565e-16	±	9.24372e-18	1.98533	12.4172	2.31017	2.23716	0.654317	3.41677	±	0.224611
Ap_OP1515-3	2.81502	3.36722	±	0.255629	30.5297	36.5185	±	1.20782	291.909	349.17	±	4.99664	7.42702e-17	±	5.72879e-18	1.19616	9.9895	11.1253	1.14139	0.614981	1.85719	±	0.174201
Ap_OP1517-1	40.0238	54.2913	±	1.41035	83.1333	112.768	±	1.98318	141.102	191.401	±	3.92121	1.32484e-15	±	2.24546e-17	1.35647	59.5601	2.13072	3.02498	0.658352	4.59343	±	0.251796
Ap_OP1517-4	43.5839	181.671	±	27.1134	56.8387	236.92	±	9.5863	114.001	475.191	±	43.2471	2.5575e-15	±	3.70699e-17	4.1683	56.941	1.33779	2.00839	0.722247	2.77792	±	0.341701
Ap_OP1518-1	40.9513	91.4002	±	16.6715	44.631	99.6132	±	4.44393	53.645	119.732	±	8.17115	2.94515e-15	±	4.5835e-17	2.23193	51.4396	1.118	4.8621	0.685124	7.12714	±	1.1884
Ap_OP1518-2	128.956	227.892	±	19.3586	138.545	244.838	±	5.77134	154.543	273.108	±	7.62944	1.04658e-14	±	1.3834e-16	1.7672	161.514	1.1021	6.80363	0.682663	9.93918	±	0.80032
Ap_OP1521-1	173.059	77.4764	±	23.0651	271.666	121.621	±	7.38946	399.781	178.977	±	28.3873	5.95329e-16	±	1.21253e-17	0.447687	236.901	1.61031	1.08117	0.612193	1.77262	±	0.45246
Ap_OP1521-2	8.45122	56.2439	±	14.8405	5.15006	34.2743	±	2.24446	61.1734	407.116	±	18.5851	4.04833e-16	±	1.13764e-17	6.65512	9.66148	0.62512	1.22613	0.749492	1.63632	±	0.453363
Ap_OP1521-3	52.0853	205.579	±	22.7021	63.2968	249.831	±	10.8468	215.811	851.801	±	43.6814	2.00363e-15	±	2.90558e-17	3.94697	66.96	1.24663	1.41175	0.714346	1.97834	±	0.202024
Ap_OP1521-4	30.0171	69.4094	±	14.5302	143.531	331.891	±	12.514	337.127	779.547	±	45.1073	1.40122e-15	±	1.93336e-17	2.31233	63.7469	4.90509	1.76703	0.654371	2.70723	±	0.304292
Ap_OP1521-5	15.8701	79.6146	±	19.8938	19.3411	97.0271	±	5.54882	66.1461	331.831	±	51.818	6.70773e-16	±	1.43636e-17	5.01664	20.4153	1.25018	1.2538	0.73559	1.70373	±	0.37432
Ap_OP1522-1	19.6848	38.839	±	1.2972	35.0244	69.1048	±	1.68336	123.537	243.745	±	3.48826	1.77883e-15	±	2.33798e-17	1.97304	27.9156	1.8252	5.97243	0.670988	8.87205	±	0.49248
Ap_OP1522-2	1.79572	2.12221	±	0.290824	1.21421	1.43498	±	0.138196	143.674	169.797	±	3.81852	8.19218e-17	±	5.75105e-18	1.18182	2.08106	0.693629	6.21659	0.616022	10.0476	±	1.49263
Ap_OP1522-3	1.78425	7.37134	±	0.357106	1.85238	7.65281	±	0.544993	153.518	634.236	±	9.62909	8.13437e-16	±	1.59327e-17	4.13134	2.21956	1.06499	16.4186	0.737614	22.2554	±	1.49389
Ap_OP1522-4	36.3854	118.543	±	17.6061	4.83469	15.7514	±	1.08251	45.7955	149.201	±	18.1319	4.97721e-15	±	7.03728e-17	3.25799	37.5215	0.136305	7.72213	0.731344	10.5585	±	1.66039
Ap_OP1523-2	30.2824	109.446	±	20.1169	49.1425	177.609	±	8.0423	63.8782	230.866	±	18.8951	4.25045e-15	±	6.30742e-17	3.61416	41.8309	1.6647	5.26143	0.724861	7.24693	±	0.962502
Ap_OP1523-3	64.9172	69.6486	±	17.0911	94.1224	100.982	±	5.39274	65.7927	70.588	±	11.569	1.98334e-15	±	3.55647e-17	1.07288	87.0359	1.48732	4.07402	0.634727	6.42996	±	1.32663
Ap_OP1527-1	84.04	96.7106	±	2.91506	10.9366	12.5855	±	0.556907	157.908	181.716	±	3.83693	1.34272e-15	±	2.02227e-17	1.15077	86.6101	0.133495	2.50292	0.617039	4.06056	±	0.235178
Ap_OP1527-2	85.5074	90.2388	±	13.03	54.2732	57.2763	±	2.53853	159.238	168.049	±	9.80861	6.25468e-16	±	1.42479e-17	1.05533	98.2616	0.651106	1.13849	0.601281	1.89789	±	0.267777
Ap_OP1527-3	21.2588	32.4798	±	0.987644	19.827	30.2922	±	0.87075	325.352	497.081	±	7.44497	3.95657e-16	±	8.41122e-18	1.52783	25.9182	0.956727	1.85107	0.6511	2.84855	±	0.165243
Ap_OP1527-4	8.73546	16.7493	±	0.642241	11.9937	22.9967	±	0.730023	196.562	376.886	±	8.40842	1.19552e-16	±	6.9971e-18	1.91739	11.554	1.40844	0.997639	0.657799	1.51798	±	0.126938
Ap_OP1527-5	56.9528	131.544	±	3.24716	49.5685	114.489	±	2.53995	114.672	264.86	±	6.08841	2.09279e-15	±	3.10801e-17	2.30971	68.6014	0.892814	2.44441	0.678586	3.61233	±	0.196252
Ap_OP1529-2	81.7853	196.216	±	4.20067	23.5659	56.5384	±	1.26553	165.862	397.929	±	3.49945	5.89475e-15	±	7.66572e-17	2.39916	87.3233	0.295583	5.20672	0.670705	7.7779	±	0.424946
Ap_OP1529-3	49.8124	91.4759	±	2.55745	9.28178	17.0451	±	0.698736	53.9309	99.0391	±	3.52353	2.00725e-15	±	2.94867e-17	1.83641	51.9936	0.191146	3.8964	0.66069	5.92865	±	0.345742
Ap_OP1529-4	44.9225	134.984	±	3.33925	13.19	39.6334	±	1.09262	140.275	421.499	±	5.76184	2.69954e-15	±	3.57012e-17	3.00481	48.0221	0.301197	3.47752	0.700197	4.94453	±	0.29776
Ap_OP1529-5	103.297	103.896	±	17.9326	78.9531	79.4112	±	3.06874	192.492	193.609	±	13.9528	1.30083e-15	±	1.30083e-15	1.0058	121.851	0.784065	2.02226	0.619284	3.25302	±	0.515063
Ap_OP1530-1	11.716	16.6572	±	0.73811	14.4361	20.5245	±	0.566142	34.0527	48.4145	±	2.35742	7.7972e-16	±	7.7972e-16	1.42175	15.1084	1.26398	6.71265	0.643322	10.4453	±	0.639576
Ap_OP1530-2	32.6963	186.385	±	4.33781	37.9988	216.613	±	5.01702	101.521	578.724	±	6.09437	1.17516e-14	±	1.17516e-14	5.70051	41.626	1.19218	9.17977	0.747397	12.2674	±	0.699063
Ap_OP1530-3	13.543	30.6972	±	0.931812	13.8661	31.4296	±	1.18188	50.1617	113.699	±	3.62733	1.26707e-15	±	1.26707e-15	2.26665	16.8015	1.0503	6.14874	0.673967	9.16013	±	0.54136
Ap_OP1531-1	2.62247	16.3151	±	0.59564	6.47561	40.2865	±	0.883345	64.9087	403.815	±	4.74375	8.38628e-16	±	1.4323e-17	6.22127	4.14424	2.53303	6.03178	0.777347	7.72687	±	0.435781
Ap_OP1531-4	8.43152	25.3995	±	1.0043	8.61428	25.95	±	0.710189	27.4029	82.5495	±	3.37275	8.5433e-16	±	1.40204e-17	3.01235	10.4559	1.04805	5.0502	0.697696	7.22374	±	0.454339
Ap_OP1531-5	7.29177	17.3881	±	0.851263	3.42515	8.16769	±	0.546821	63.7126	151.931	±	4.70604	5.61462e-16	±	1.0391e-17	2.3845	8.09668	0.481856	5.37782	0.676811	7.96088	±	0.545247
Ap_OP1532-1	15.2518	36.9664	±	1.01481	41.9013	101.558	±	2.68039	128.848	312.293	±	4.83723	5.03776e-16	±	9.67726e-18	2.4237	25.0986	2.81823	1.52785	0.691591	2.21413	±	0.12808
Ap_OP1532-2	57.7628	76.1475	±	12.7312	46.0212	60.6687	±	4.47764	110.652	145.87	±	29.556	2.69026e-16	±	7.19935e-18	1.31814	68.5778	0.817297	0.567867	0.621987	0.913325	±	0.139546
Ap_OP1532-3	141.52	107.475	±	18.2231	94.5468	71.802	±	3.83161	85.797	65.1571	±	16.9684	6.6063e-16	±	1.65336e-17	0.759246	163.739	0.685327	1.00765	0.598047	1.67929	±	0.272738
Ap_OP1532-4	63.8723	138.572	±	3.48922	112.276	243.585	±	4.35679	102.074	221.453	±	4.42437	1.98063e-15	±	3.21633e-17	2.16946	90.2572	1.8032	1.87135	0.703467	2.66303	±	0.147677
Ap_OP1532-5	9.81191	14.8831	±	0.756291	25.426	38.5673	±	0.98025	170.429	258.514	±	6.44124	1.28259e-16	±	5.59779e-18	1.51675	15.787	2.65824	0.989956	0.652936	1.51547	±	0.108317
Ap_OP1533-1	8.86273	20.7898	±	0.743755	18.6214	43.6813	±	1.31208	25.4895	59.792	±	2.14009	2.64644e-16	±	8.91218e-18	2.34567	13.2388	2.15534	1.57728	0.657432	2.39582	±	0.159247
Ap_OP1533-2	31.7304	37.2605	±	1.14583	36.1859	42.4926	±	1.36758	66.8237	78.4702	±	3.20314	3.53538e-16	±	1.03056e-17	1.17414	40.234	1.16986	1.38282	0.611847	2.26409	±	0.142742
Ap_OP1533-3	25.6143	31.7732	±	1.39493	13.8809	17.2185	±	0.698282	20.0931	24.9243	±	2.54058	3.74863e-16	±	1.02543e-17	1.2403	28.8763	0.555911	1.93216	0.618025	3.14035	±	0.213649
Ap_OP1534-2	56.4865	84.0676	±	14.8174	51.8354	77.1454	±	3.04226	66.0832	98.35	±	4.94271	6.80744e-16	±	1.28857e-17	1.4881	68.6679	0.941352	1.25506	0.674885	1.85951	±	0.280518
Ap_OP1534-3	114.241	278.561	±	22.2968	69.2233	168.791	±	4.75708	121.328	295.84	±	7.09113	2.74718e-15	±	4.09529e-17	2.43822	130.509	0.621584	1.61031	0.696928	2.30287	±	0.195637
Ap_OP1534-4	88.13	108.562	±	12.6623	103.063	126.957	±	5.55853	184.364	227.107	±	5.75374	9.37424e-16	±	1.76151e-17	1.23166	112.35	1.19963	1.26483	0.640535	1.97181	±	0.206692
Ap_OP1536-1	24.9773	49.6588	±	1.51107	31.5971	62.82	±	1.29011	155.03	308.224	±	4.26639	1.74039e-15	±	2.66541e-17	1.98804	32.4026	1.29769	4.98769	0.679912	7.36116	±	0.434135
Ap_OP1536-2	41.2746	98.6029	±	2.55072	87.9827	210.186	±	4.42193	138.223	330.207	±	5.37646	3.9147e-15	±	5.48778e-17	2.38885	61.9505	2.18668	4.86669	0.726746	6.72563	±	0.364885
Ap_OP1536-3	61.4952	138.487	±	2.85724	102.787	231.477	±	3.98326	136.658	307.754	±	6.5498	6.54508e-15	±	8.05068e-17	2.25189	85.6502	1.71462	6.26618	0.715885	8.77159	±	0.477985
Ap_OP1539-1	69.4436	131.627	±	2.36108	210.413	398.827	±	11.0622	132.153	250.488	±	4.00771	1.86582e-15	±	2.33676e-17	1.89545	118.891	3.10822	1.52585	0.68563	2.23164	±	0.120421
Ap_OP1539-2	105.745	126.096	±	2.77118	32.8036	39.1169	±	0.962202	217.783	259.697	±	4.09942	1.29129e-15	±	1.76544e-17	1.19246	113.453	0.318224	1.77727	0.615014	2.8717	±	0.163855
Ap_OP1539-3	19.7214	44.1005	±	12.3592	69.2207	154.79	±	6.35124	247.423	553.28	±	27.8406	3.3292e-16	±	9.78548e-18	2.23618	35.9882	3.60055	0.783244	0.679158	1.15231	±	0.193113
Ap_OP1539-4	111.098	135.927	±	18.6246	107.424	131.432	±	5.04699	247.928	303.337	±	28.0007	1.10726e-15	±	1.83145e-17	1.22349	136.342	0.991896	1.24151	0.61776	2.0064	±	0.243113
Ap_OP1539-5	11.2695	20.9552	±	1.13935	41.0264	76.2867	±	2.55136	39.3637	73.1949	±	3.12166	3.00403e-16	±	7.13957e-18	1.85945	20.9107	3.73446	1.43422	0.641585	2.22615	±	0.146133
Ap_OP1540-1	20.9787	104.535	±	14.4633	24.8776	123.963	±	4.66582	143.667	715.881	±	15.9617	8.97666e-16	±	2.20101e-17	4.98291	26.8249	1.21646	1.25779	0.748491	1.67943	±	0.203407
Ap_OP1540-2	33.845	59.578	±	11.028	7.54452	13.2808	±	0.928913	117.905	207.551	±	11.3646	1.33515e-16	±	8.2318e-18	1.76032	35.618	0.228669	0.410659	0.660527	0.620585	±	0.128715
Ap_OP1540-3	145.245	129.6	±	14.8675	91.9309	82.0286	±	3.33053	295.659	263.812	±	16.6395	8.94702e-16	±	1.93681e-17	0.892286	166.849	0.649277	1.12192	0.632619	1.77465	±	0.205849
Ap_OP1540-4	63.3156	194.939	±	26.4663	16.2403	50.0013	±	2.20493	74.659	229.863	±	13.9288	1.62038e-15	±	2.70825e-17	3.07884	67.1321	0.26312	1.47457	0.697651	2.10999	±	0.287842
Ap_OP1542-5	38.5397	50.0976	±	14.0911	39.3964	51.2113	±	2.03854	135.202	175.749	±	11.1723	4.35806e-16	±	1.07261e-17	1.2999	47.7978	1.04862	1.37491	0.686454	2.00141	±	0.531259
Ap_OP1542-6	37.4163	47.0477	±	9.41928	48.4286	60.8947	±	2.44038	145.697	183.201	±	8.34209	3.16427e-16	±	8.76887e-18	1.25741	48.797	1.32774	0.972018	0.636713	1.52752	±	0.265719
Ap_OP1542-7	40.244	47.0186	±	10.0043	28.9402	33.812	±	1.05275	137.819	161.019	±	8.38054	2.92441e-16	±	8.06131e-18	1.16834	47.0449	0.737685	1.03264	0.694291	1.48943	±	0.311891
Ap_OP1542-8	6.00995	100.476	±	20.1665	29.5928	494.739	±	15.2941	83.1448	1390.03	±	12.5994	2.88183e-15	±	4.04143e-17	16.7182	12.9642	5.05109	2.47639	0.810944	3.04637	±	0.322376
Ap_OP1545-1	51.576	46.1058	±	8.62615	40.7502	36.4283	±	1.22447	493.927	441.542	±	11.652	2.48553e-15	±	3.73449e-17	0.893752	61.1523	0.8105	8.64931	0.616744	14.006	±	2.42634
Ap_OP1545-2	51.5601	54.1249	±	16.8219	51.9322	54.5155	±	2.03268	473.943	497.519	±	17.0198	3.89654e-15	±	5.48883e-17	1.04957	63.7642	1.03322	11.5764	0.631516	18.2758	±	5.59768
Ap_OP1545-3	50.861	60.9689	±	12.048	36.5821	43.8523	±	1.55334	385.765	462.43	±	17.3971	4.25711e-15	±	5.5253e-17	1.19857	59.4578	0.737827	11.418	0.680358	16.8003	±	3.24251
Ap_OP1545-4	60.4191	48.1351	±	9.61869	54.6622	43.5486	±	1.41624	484.957	386.358	±	9.92055	4.47624e-15	±	6.66316e-17	0.796492	73.2647	0.928074	14.5533	0.663864	21.8904	±	3.90856
Ap_OP1547-1	3.34026	59.6181	±	13.7289	5.94494	106.107	±	4.1028	121.76	2173.21	±	44.2076	5.27849e-15	±	6.66386e-17	17.8496	4.73732	1.82573	11.7575	0.826005	14.2336	±	2.58527
Ap_OP1547-2	1.53864	13.6266	±	0.550553	3.03354	26.8659	±	0.966953	139.39	1234.48	±	12.0968	2.54577e-15	±	3.65299e-17	8.85648	2.25152	2.02248	23.5557	0.765013	30.8375	±	1.95641
Ap_OP1547-3	1.81454	11.8154	±	0.572787	7.07662	46.0793	±	0.871939	143.687	935.617	±	8.76509	2.01122e-15	±	2.69449e-17	6.51156	3.47755	4.00063	16.3547	0.759296	21.6055	±	1.23652
Ap_OP1547-4	2.19402	14.6862	±	0.620968	7.9587	53.2734	±	1.03251	163.709	1095.82	±	8.52382	2.79099e-15	±	3.56196e-17	6.69382	4.06431	3.72111	18.9256	0.758499	24.9764	±	1.43078
Ap_OP1547-5	2.17206	13.6591	±	0.545998	8.15171	51.2626	±	1.29297	135.706	853.4	±	10.7229	3.65696e-15	±	5.12899e-17	6.28864	4.08771	3.84988	26.1401	0.749097	35.0269	±	1.90663
Ap_OP1548-1	105.448	136.827	±	3.21374	88.2608	114.526	±	2.83148	216.087	280.391	±	4.81323	7.19763e-15	±	1.05804e-16	1.29747	126.189	0.858621	8.12823	0.632816	12.8712	±	0.686601
Ap_OP1548-2	16.4012	19.401	±	0.904863	38.8691	45.9783	±	1.39131	65.8464	77.8898	±	3.09895	1.40383e-15	±	2.38346e-17	1.18278	25.5354	2.43107	8.57598	0.612779	13.9956	±	0.855412
Ap_OP1548-3	4.92999	8.33102	±	0.370949	16.4493	27.7972	±	0.803077	354.934	599.791	±	7.44377	9.86944e-16	±	1.6386e-17	1.68976	8.79558	3.42273	12.2026	0.680482	18.006	±	1.08066
Ap_OP1548-4	2.12011	4.69801	±	0.336054	4.94311	10.9536	±	0.59835	22.885	50.7116	±	2.33015	7.65852e-16	±	1.24488e-17	2.21585	3.28174	2.39173	19.5371	0.678219	28.7356	±	2.06585
Ap_OP1565-1	40.281	223.246	±	19.4096	12.3905	68.6709	±	3.09789	82.7569	458.657	±	24.9116	5.95544e-15	±	9.27921e-17	5.54222	43.1928	0.315543	4.64079	0.762517	6.07138	±	0.568096
Ap_OP1565-2	35.7401	77.7351	±	14.2647	22.8182	49.6298	±	2.28069	174.254	379.005	±	12.484	1.71799e-15	±	3.11675e-17	2.17501	41.1023	0.654931	3.64641	0.682463	5.36724	±	0.957551
Ap_OP1565-3	33.1212	41.2	±	10.3547	11.0871	13.7914	±	0.927357	106.308	132.238	±	9.77187	2.52375e-16	±	8.43901e-18	1.24392	35.7267	0.343384	1.12567	0.643745	1.74382	±	0.700512
Ap_OP1565-4	37.7398	152.921	±	20.9859	26.5039	107.394	±	3.86082	90.4498	366.501	±	10.6825	4.60655e-15	±	5.48085e-17	4.05198	43.9682	0.720413	4.87126	0.77964	6.22541	±	0.804346
Ap_OP1580-1	8.72655	56.7059	±	14.3292	42.3841	275.416	±	10.5046	153.933	1000.27	±	12.1113	2.80006e-15	±	4.86537e-17	6.49809	18.6868	4.98232	4.3166	0.73036	5.89279	±	0.766937
Ap_OP1580-2	20.6794	276.592	±	31.2527	24.3429	325.593	±	9.69191	81.5637	1090.94	±	16.7625	9.73048e-15	±	1.21857e-16	13.3753	26.4	1.20755	5.11836	0.811647	6.31767	±	0.66921
Ap_OP1580-3	19.2033	93.7031	±	10.8623	10.5185	51.3251	±	2.6435	137.135	669.153	±	10.0465	1.4554e-15	±	2.60297e-17	4.87952	21.6752	0.561883	2.57962	0.782341	3.30764	±	0.3785
Ap_OP1580-4	30.599	169.58	±	24.5327	35.9336	199.144	±	5.78416	117.652	652.027	±	12.8886	4.35737e-15	±	5.45751e-17	5.542	39.0434	1.20466	3.78332	0.751076	5.02544	±	0.62976
Ap_OP1582-1	13.2762	68.858	±	12.4312	7.83926	40.6591	±	1.87687	38.6922	200.681	±	13.5958	6.45478e-16	±	1.32086e-17	5.18659	15.1184	0.605722	1.55472	0.748746	2.07754	±	0.384416
Ap_OP1582-2	12.4071	48.1729	±	11.5719	13.6783	53.1083	±	2.31658	155.033	601.941	±	11.383	3.09648e-16	±	7.5593e-18	3.88267	15.6215	1.13092	0.969928	0.726048	1.33445	±	0.267973
Ap_OP1582-3	40.2097	110.741	±	19.856	55.9274	154.029	±	5.16132	148.528	409.059	±	11.8168	1.27692e-15	±	2.22127e-17	2.7541	53.3526	1.4268	1.62592	0.689717	2.36031	±	0.341531
Ap_OP1582-4	12.3501	50.5977	±	10.6596	7.619	31.2145	±	1.34539	21.3439	87.4445	±	4.01041	2.71086e-16	±	8.94383e-18	4.09693	14.1406	0.632844	0.887901	0.721997	1.23259	±	0.257526
